# Supplementary material for: Community Management That Works: How to Build and Sustain a Thriving Online Health Community
Source: J Med Internet Res. 2013 Jun 11;15(6):e119. doi: 10.2196/jmir.2501 (PMC3713910; doi:10.2196/jmir.2501)
Supplement: Supplementary file 1 [file jmir_v15i6e119_app1.pdf]

**Multimedia Appendix 1.** Online communities mentioned in this paper.

| Community                                                              | Description                                                                                                                      | Supporting Organization                      | Community Manager |
|------------------------------------------------------------------------|----------------------------------------------------------------------------------------------------------------------------------|----------------------------------------------|-------------------|
| Health Care Social Media Canada [12]                                   | A community of practice for people interested in exploring social innovation in health care                                      | Volunteer led                                | Colleen Young     |
| Canadian Virtual Hospice/<br>Portail canadien en soins palliatifs [14] | Online resources and community for people living with limited time, losing someone, caring for someone, or working through grief | Canadian Virtual Hospice                     | Colleen Young     |
| SharingStrength/<br>FortesEnsemble [11]                                | A Canadian online resource library and community for women with breast cancer                                                    | SharingStrength                              | Colleen Young     |
| CancerConnection/<br>ParlonsCancer [13]                                | An online community for people touched by cancer                                                                                 | Canadian Cancer Society                      | Heather Sinardo   |
| Crohnology [26]                                                        | Social health network for people with Crohn's and colitis                                                                        | Healthy Labs, Inc.                           | Sean Ahrens       |
| BabyCenter [27]                                                        | Online resources and community for new, expecting, and "actively trying" parents                                                 | BabyCenter Canada                            | N/A               |
| ACOR [31]                                                              | Collection of 140+ online cancer communities                                                                                     | Association of Cancer Online Resources, Inc. | Gilles Frydman    |
| Tudiabetes [33]                                                        | An online community of people touched by diabetes                                                                                | Diabetes Hands Foundation                    | Manny Hernandez   |
| PatientsLikeMe [38]                                                    | An online community of people sharing health experiences to help themselves, other patients, and organizations                   | PatientsLikeMe                               | Liz Morgan        |
| MyMacmillan Online Community [45]                                      | An online community for anyone affected by cancer in any way                                                                     | Macmillan Cancer Support                     | Laura Goss        |
